# Supplementary material for: Brassica rapa L. crude polysaccharide ameliorates hypobaric and hypoxia induced oxidative stress and intestinal damage by modulating gut microbiome
Source: Research Square preprint supplement (doi:10.21203/rs.3.rs-5060965/v1), 2024-11-26
Supplement: Supplementary file 1 [file 6bbaa7b8c73a0b91d5a9c5d5.docx]

**Supporting Information**

**Supplementary Figure 1**

**Supplementary Figure. 1.** Alpha Diversity (A) Shannon diversity analysis. (B) Simpson diversity analysis.
